# Supplementary material
Source: PubMed Central journal article supplement (PMC2915630)

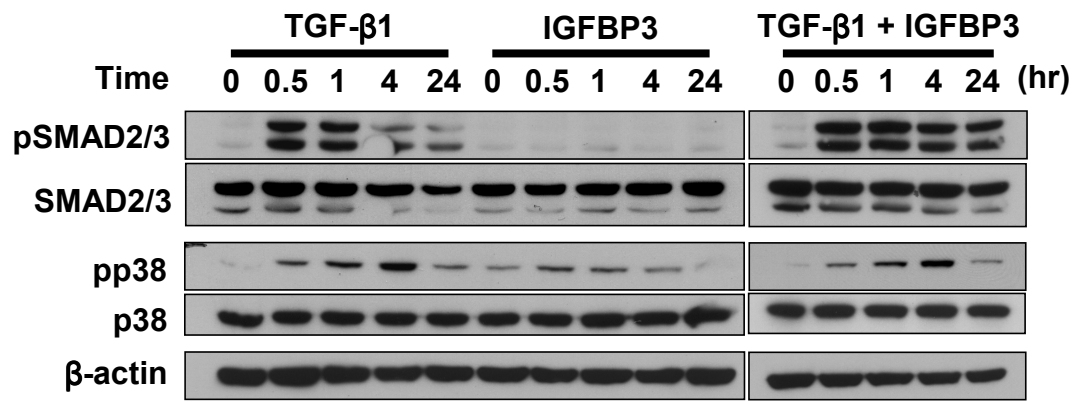

**Supplementary Fig. 1**

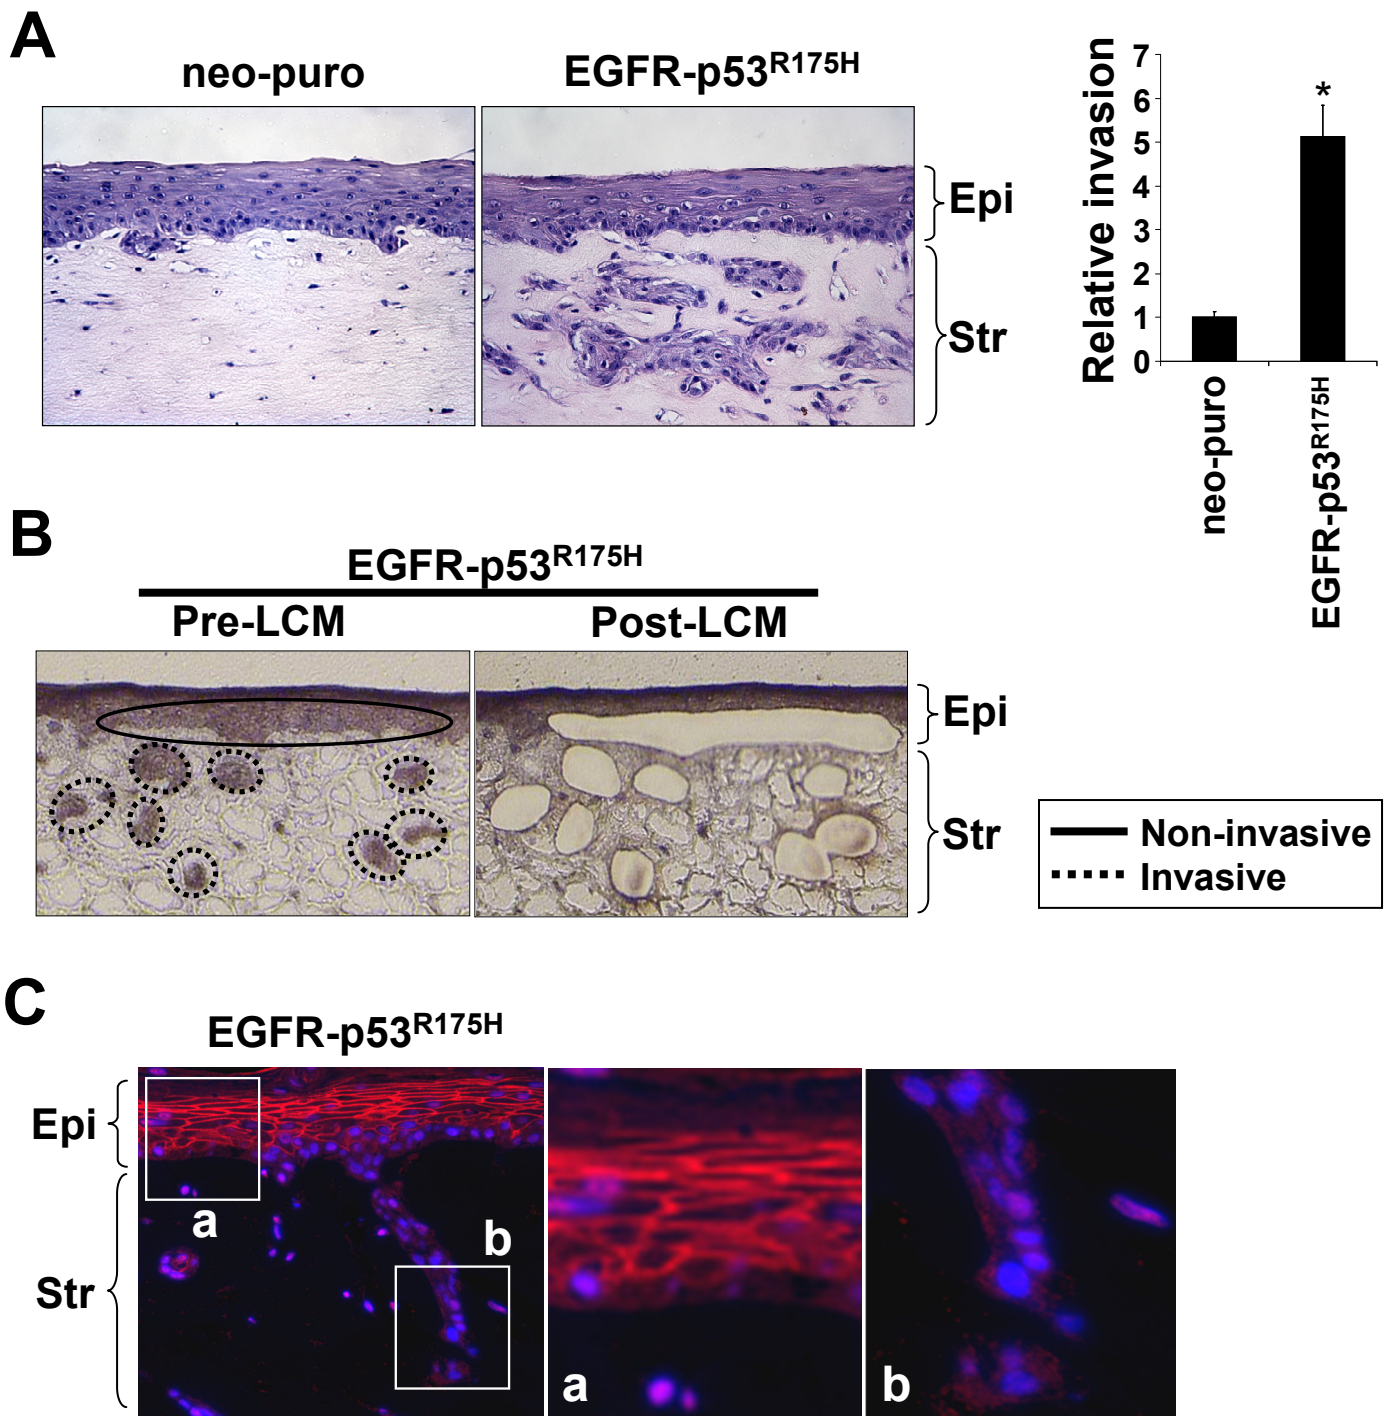

Supplementary Fig. 2

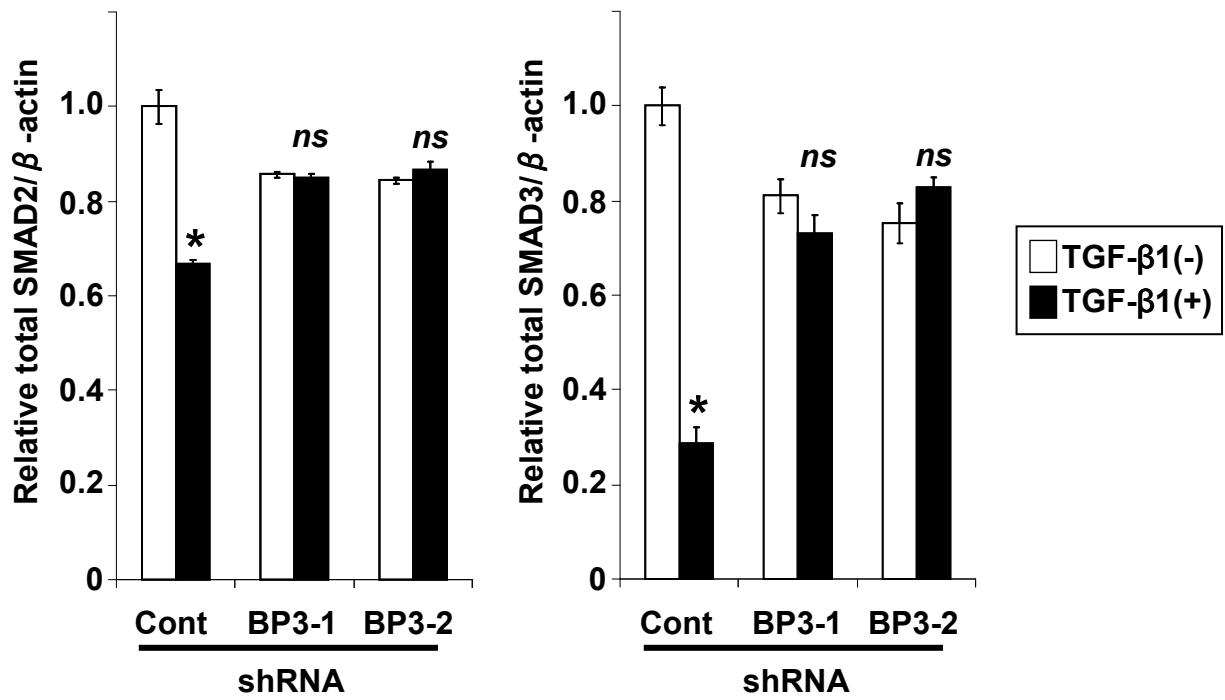

Supplementary Fig. 3

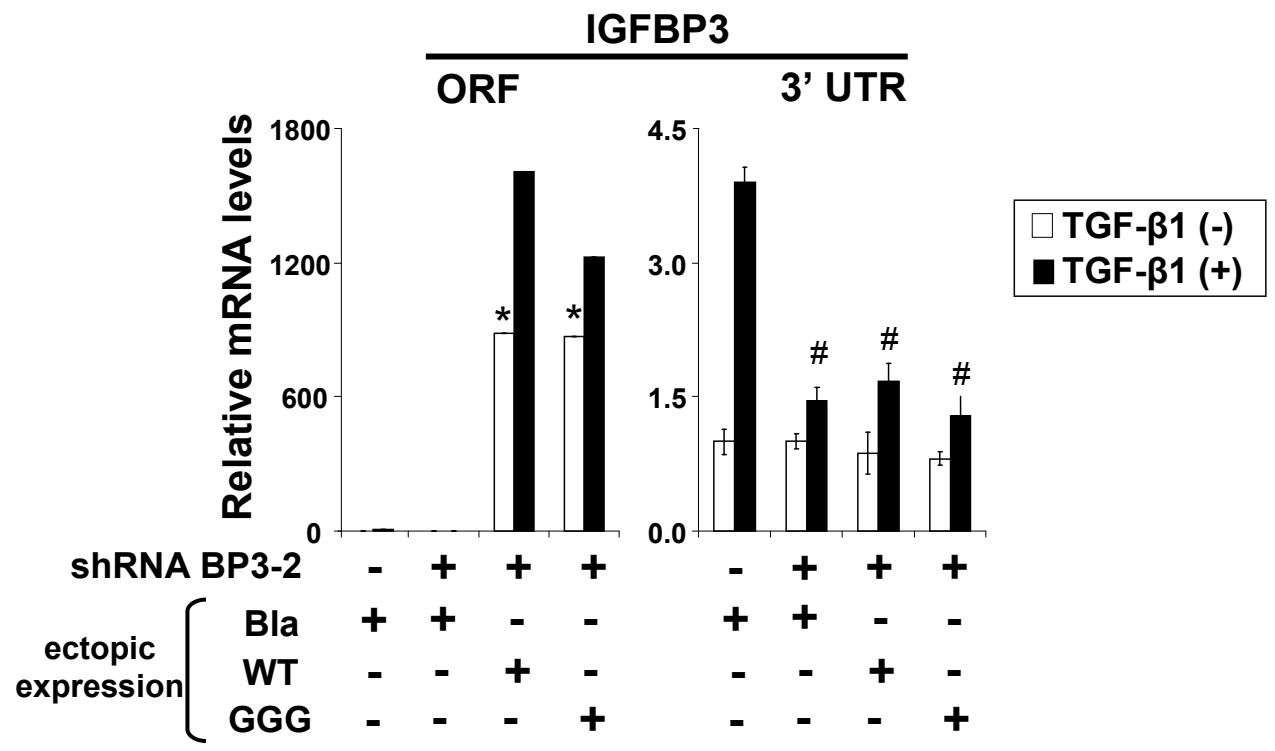

**Supplementary Fig. 4**

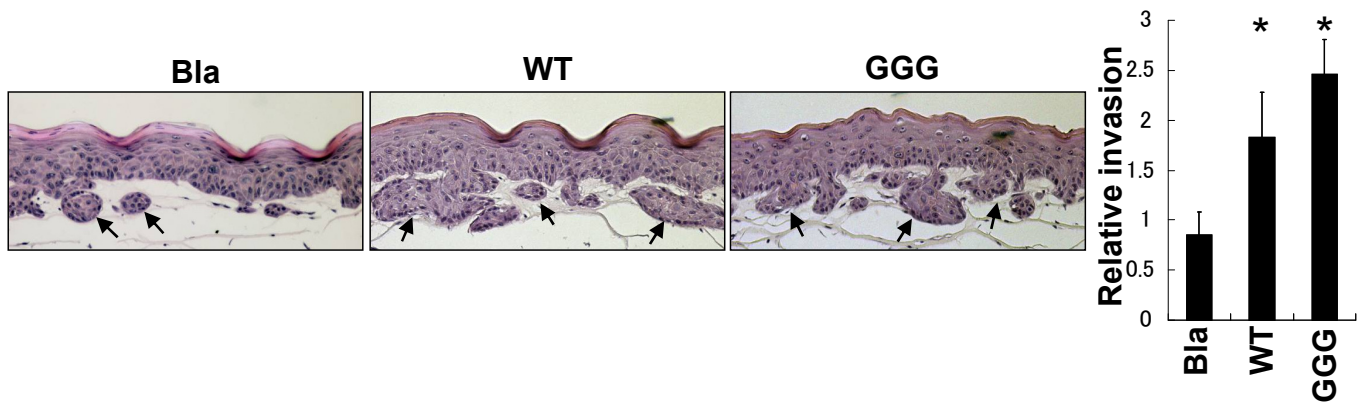

**Supplementary Fig. 5**

**Bla**

**GGG**

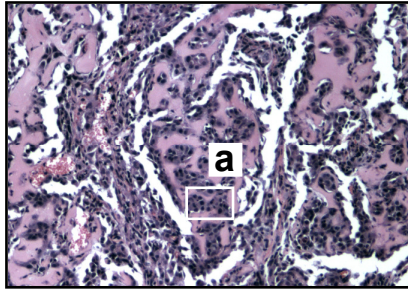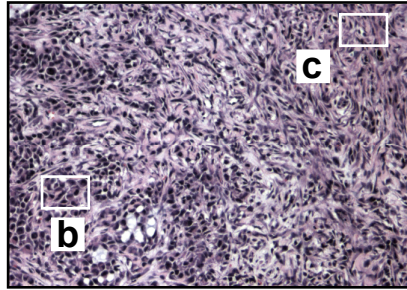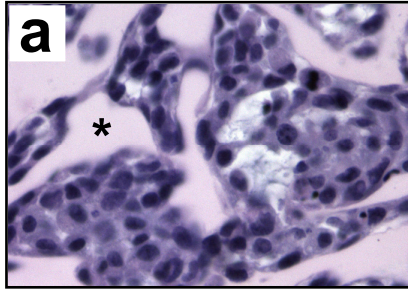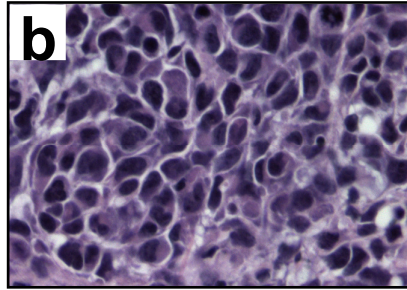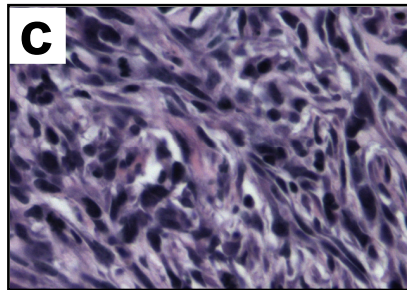

Supplement: bgq108_1.pdf [file bgq108_1.pdf]
